# Supplementary material
Source: MDPI journal article supplement (https://www.mdpi.com/2227-9717/9/3/456)
Supplement: s1 [file s1]

# Supplementary Materials: Study of Amine Functionalized Mesoporous Carbon as CO<sub>2</sub> Storage Materials

Muhamad Faisal, Afif Zulfikar Pamungkas and Yuni Krisyuningsih Krisnandi \*

## 1. FTIR

The FTIR spectra of mesoporous carbon before carbonization process (MC-PC) compared to as-synthesized mesoporous carbon (MC) are shown in Figure 1a. The broad band in the range of 3250–3500 cm<sup>-1</sup> is assigned to O–H stretching vibration of phloroglucinol [33]. The weak band at ~2923 cm<sup>-1</sup> corresponds to symmetric and asymmetric C–H stretching vibrations that come from a bonding between formaldehyde and phloroglucinol [1]. After carbonization process, these bands disappeared, showing the complete removal of most of oxygen and hydrogen atoms of the precursors, Figure 1b.

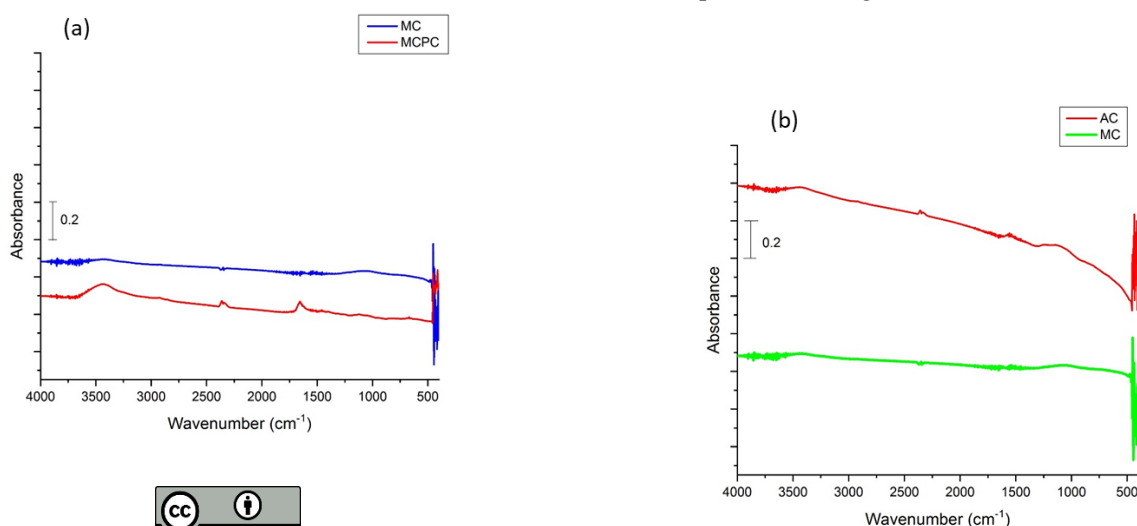

**Copyright:** © 2021 by the authors. Licensee MDPI, Basel, Switzerland. This article is an open access article distributed under the terms and conditions of the Creative Commons Attribution (CC BY) license (<http://creativecommons.org/licenses/by/4.0/>).

(a)

(b)

**Figure S1.** FT-IR spectra of MC (a) before (red) and after carbonization (blue); (b) MC (brown) and AC (green).

## 2. % Loading of Amine Compounds in Mesoporous Carbon and Activated Carbon

The %loading of amine compound was determined from EDX measurement, based on the wt% of N, and calculated using equation 1.

Example:

MCEDA49

**Table S1.** EDX for MCEDA49.

| Materials | wt%   |       |       |
|-----------|-------|-------|-------|
|           | C     | N     | O     |
| MC-EDA49  | 56.11 | 23.23 | 20.66 |

Calculation:

$$\% \text{loading} = \frac{\text{Mr EDA}}{2 \times \text{Ar N}} \times \text{Wt\% N} = \frac{60 \text{ g/mol}}{2 \times 14 \text{ g/mol}} \times 23.23\% = 49\% \quad (1)$$

Using similar calculation, we summarized the list of MC and AC derivatives in Table S2 below:

**Table S2.** Name of adsorbent materials

| Materials | Amine loading |      | Name of adsorbent |
|-----------|---------------|------|-------------------|
|           | Target        | Real |                   |
| MC/EDA    | 50            | 49   | MCEDA49           |
| MC/TETA   | 50            | 52   | MCTETA52          |
| AC/TETA   | 30            | 14   | ACTETA14          |
| AC/TETA   | 50            | 21   | ACTETA21          |
